# Supplementary material for: Hypoxic enhancement of exosome release by breast cancer cells
Source: PubMed Central journal article supplement (PMC3488584; doi:10.1186/1471-2407-12-421), 2012-09-24

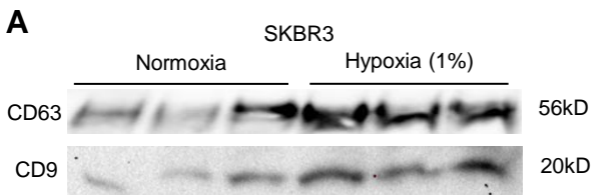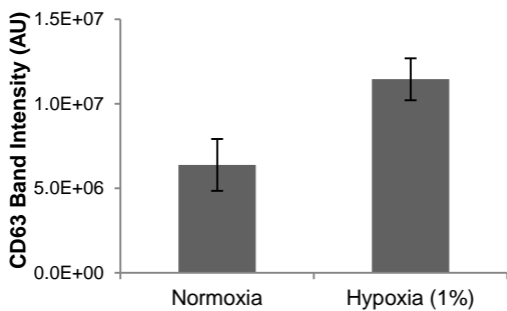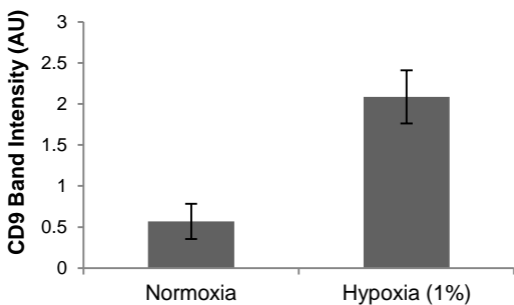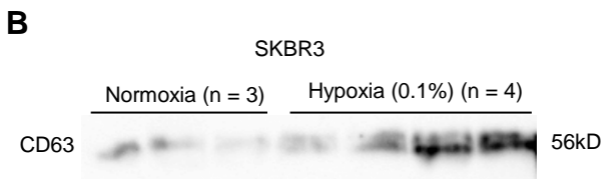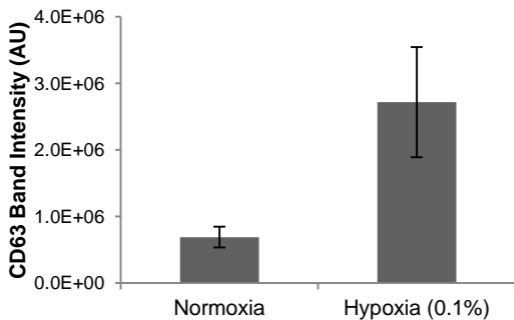

Supplement: 1471-2407-12-421-S3.pdf [file 1471-2407-12-421-S3.pdf]
